# Supplementary material
Source: PubMed Central journal article supplement (PMC3578114)

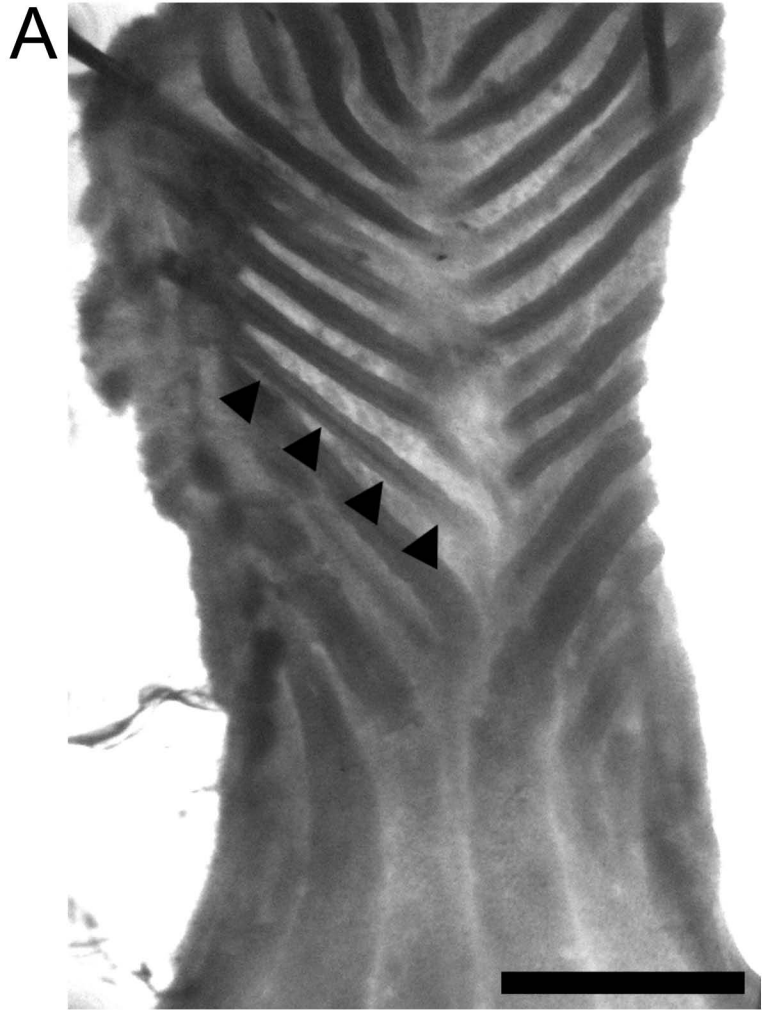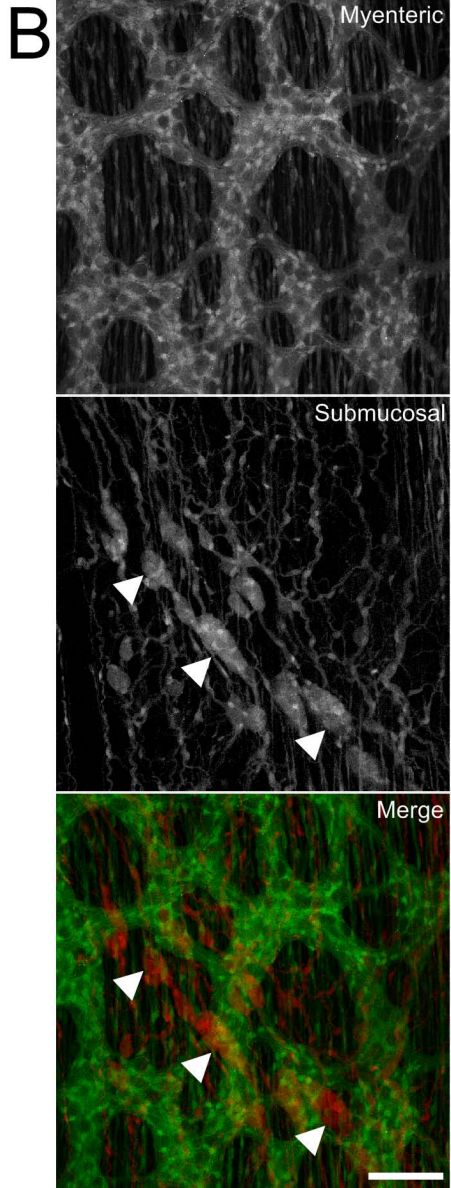

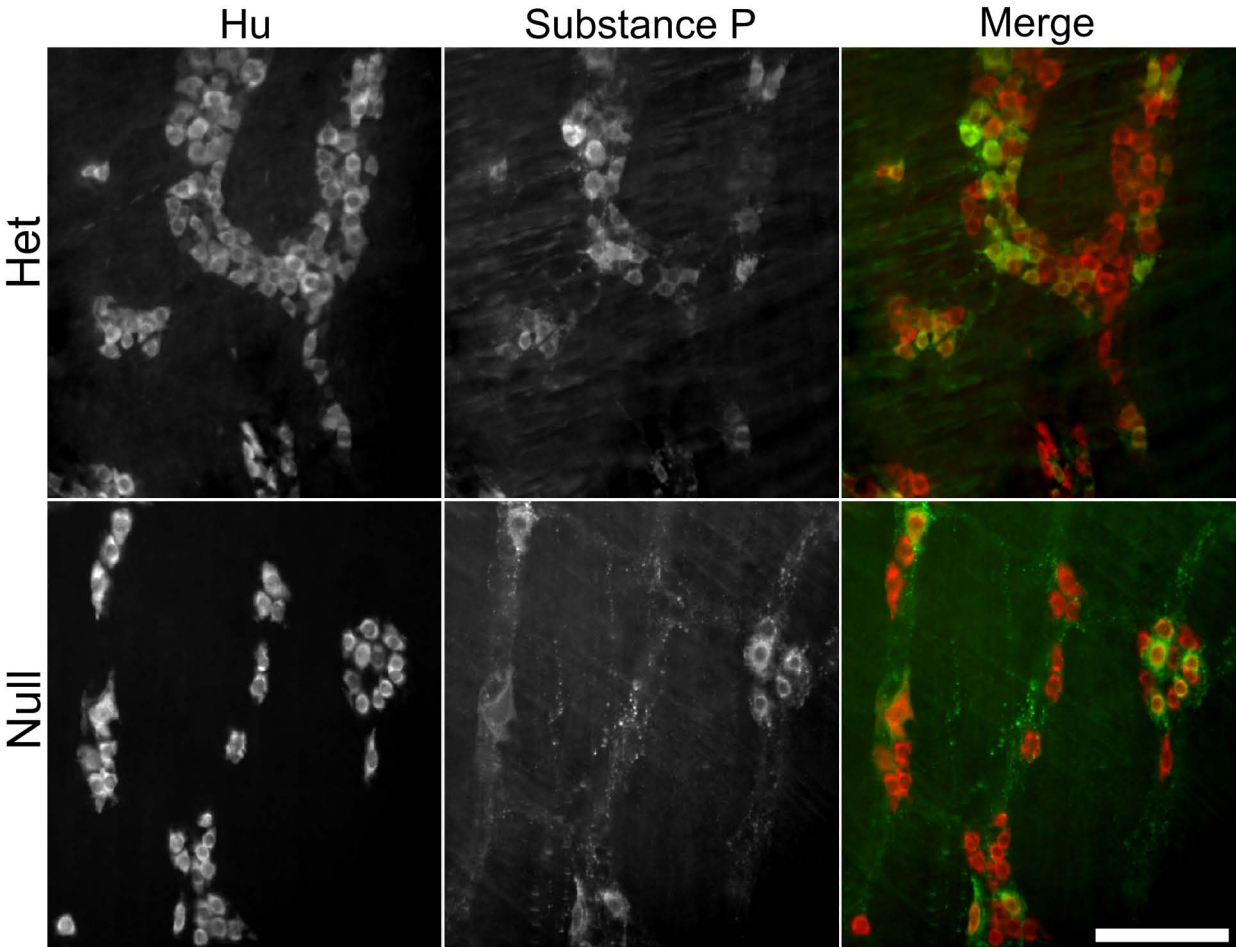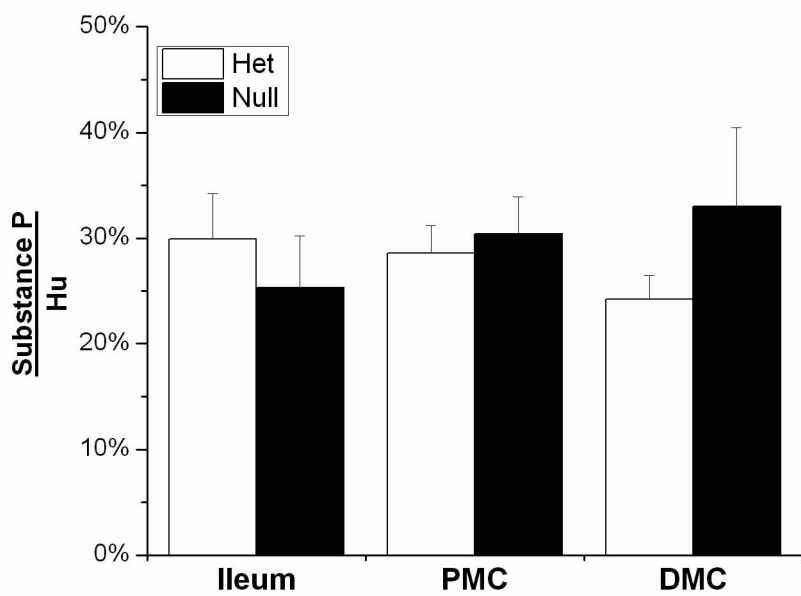

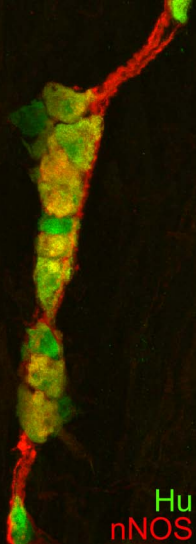

Hu  
nNOS

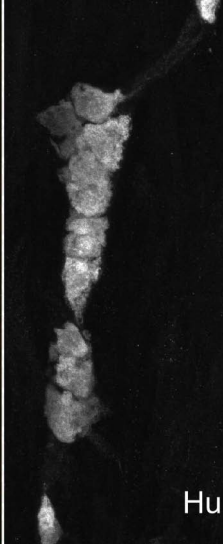

Hu

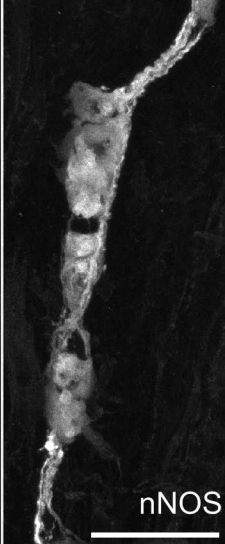

nNOS

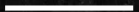

Supplement: NIHMS431967-supplement-Supp_Fig_S1-S3.pdf [file NIHMS431967-supplement-Supp_Fig_S1-S3.pdf]
